# Supplementary material for: Healthcare Utilization for Lateral Epicondylitis: A 9-Year Analysis of the 2010–2018 Health Insurance Review and Assessment Service National Patient Sample Data
Source: MDPI journal article supplement (doi:10.3390/healthcare10040636), 2022-03-28
Supplement: s1 [file s1]

**Table S1.** Annual average KRW-USD exchange rate and price level of health expenditure.

| <b>Year</b> | <b>KRW/USD</b>  | <b>Price level</b> |
|-------------|-----------------|--------------------|
| 2010        | 1,156.00        | 0.9345             |
| 2011        | 1,107.99        | 0.9510             |
| 2012        | 1,126.76        | 0.9597             |
| 2013        | 1,095.04        | 0.9631             |
| 2014        | 1,053.12        | 0.9699             |
| 2015        | 1,131.52        | 0.9820             |
| 2016        | 1,160.41        | 0.9918             |
| 2017        | 1,130.48        | 1.0005             |
| <b>2018</b> | <b>1,100.58</b> | <b>1.0000</b>      |

This information is available on the following site: Korean Statistical Information Service (<http://kosis.kr>).

The price level of health expenditure is adjusted as of year 2018.

**Table S2.** Basic characteristics of medical usage.

| Category               |                                | Total<br>(2010-2018) |       | WM<br>(2010-2018) |       | KM<br>(2010-2018) |       |
|------------------------|--------------------------------|----------------------|-------|-------------------|-------|-------------------|-------|
|                        |                                | No. of<br>claims     | %     | No. of<br>claims  | %     | No. of<br>claims  | %     |
| Type of<br>visit       | Outpatient                     | 757,661              | 99.78 | 591,902           | 99.72 | 165,759           | 99.98 |
|                        | Inpatient                      | 1,686                | 0.22  | 1,652             | 0.28  | 34                | 0.02  |
| Medical<br>institution | Medical center <sup>†</sup>    | 110,437              | 14.54 | 110,266           | 18.58 | 171               | 0.1   |
|                        | Medical clinic                 | 482,957              | 63.6  | 482,957           | 81.37 | -                 | -     |
|                        | KM medical center <sup>‡</sup> | 3,347                | 0.44  | 331               | 0.06  | 3,016             | 1.82  |
|                        | KM clinic                      | 162,606              | 21.41 | -                 | -     | 162,606           | 98.08 |

WM, Western Medicine; KM, Korean Medicine.

All expenditures were converted with annual average exchange rate (KRW/USD) (See Supplementary Table 1)

<sup>†</sup>Claims in KM (n = 171): KM clinics within medical centers

<sup>‡</sup>Claims in WM (n = 331): WM clinics in KM medical centers

**Table S3.** Number of patients by month, year, and age in detail.

| Month*    | Age         | Year |      |      |      |      |      |      |      |      |
|-----------|-------------|------|------|------|------|------|------|------|------|------|
|           |             | 2010 | 2011 | 2012 | 2013 | 2014 | 2015 | 2016 | 2017 | 2018 |
| 1 (-1.29) | Under 15    | 6    | 3    | 3    | 4    | 4    | 6    | 4    | 1    | 2    |
|           | 15-24       | 14   | 20   | 19   | 40   | 23   | 28   | 24   | 27   | 19   |
|           | 25-34       | 69   | 67   | 77   | 93   | 96   | 94   | 77   | 72   | 90   |
|           | 35-44       | 421  | 442  | 491  | 461  | 573  | 551  | 506  | 498  | 507  |
|           | 45-54       | 756  | 880  | 955  | 1001 | 1095 | 1146 | 1182 | 1087 | 1217 |
|           | 55-64       | 363  | 429  | 543  | 559  | 588  | 717  | 728  | 781  | 817  |
|           | 65-74       | 159  | 125  | 174  | 209  | 226  | 256  | 227  | 242  | 243  |
|           | 75 or older | 30   | 26   | 42   | 41   | 47   | 50   | 52   | 43   | 70   |
| 2 (1.29)  | Under 15    | 0    | 4    | 8    | 3    | 4    | 3    | 3    | 2    | 1    |
|           | 15-24       | 13   | 15   | 23   | 22   | 19   | 22   | 29   | 23   | 14   |
|           | 25-34       | 75   | 67   | 85   | 85   | 76   | 75   | 81   | 84   | 75   |
|           | 35-44       | 421  | 436  | 515  | 494  | 480  | 502  | 512  | 511  | 486  |
|           | 45-54       | 725  | 828  | 974  | 984  | 1029 | 968  | 1120 | 1121 | 1028 |
|           | 55-64       | 339  | 386  | 497  | 534  | 581  | 576  | 683  | 785  | 747  |
|           | 65-74       | 149  | 159  | 167  | 212  | 189  | 179  | 231  | 252  | 228  |
|           | 75 or older | 18   | 23   | 33   | 30   | 45   | 48   | 48   | 57   | 56   |
| 3 (6.49)  | Under 15    | 5    | 10   | 8    | 3    | 12   | 6    | 11   | 7    | 8    |
|           | 15-24       | 25   | 30   | 30   | 25   | 24   | 20   | 37   | 30   | 23   |
|           | 25-34       | 89   | 86   | 93   | 86   | 92   | 107  | 80   | 94   | 103  |
|           | 35-44       | 415  | 474  | 533  | 482  | 594  | 575  | 555  | 585  | 564  |
|           | 45-54       | 806  | 937  | 974  | 989  | 1094 | 1121 | 1256 | 1189 | 1212 |
|           | 55-64       | 395  | 455  | 531  | 521  | 593  | 669  | 755  | 799  | 917  |
|           | 65-74       | 171  | 171  | 207  | 212  | 203  | 222  | 265  | 259  | 273  |
|           | 75 or older | 30   | 34   | 48   | 35   | 34   | 61   | 50   | 49   | 67   |
| 4 (12.34) | Under 15    | 5    | 12   | 5    | 4    | 4    | 5    | 8    | 6    | 9    |
|           | 15-24       | 17   | 22   | 26   | 25   | 30   | 26   | 25   | 26   | 19   |
|           | 25-34       | 97   | 82   | 74   | 93   | 99   | 93   | 84   | 66   | 88   |
|           | 35-44       | 460  | 457  | 399  | 495  | 431  | 503  | 474  | 480  | 485  |
|           | 45-54       | 790  | 802  | 796  | 869  | 899  | 1005 | 970  | 1048 | 1033 |
|           | 55-64       | 338  | 408  | 441  | 501  | 505  | 570  | 602  | 666  | 691  |
|           | 65-74       | 137  | 147  | 181  | 169  | 188  | 210  | 208  | 220  | 243  |
|           | 75 or older | 28   | 24   | 34   | 40   | 42   | 42   | 49   | 41   | 56   |
| 5 (18.06) | Under 15    | 7    | 6    | 5    | 8    | 3    | 7    | 2    | 8    | 11   |
|           | 15-24       | 13   | 20   | 25   | 40   | 35   | 29   | 34   | 33   | 36   |
|           | 25-34       | 76   | 79   | 69   | 89   | 87   | 83   | 92   | 94   | 74   |
|           | 35-44       | 458  | 496  | 544  | 524  | 481  | 491  | 505  | 485  | 511  |
|           | 45-54       | 745  | 851  | 876  | 997  | 904  | 919  | 1046 | 1040 | 1083 |

|            |             |     |     |     |     |     |     |      |      |      |
|------------|-------------|-----|-----|-----|-----|-----|-----|------|------|------|
|            | 55-64       | 321 | 355 | 488 | 536 | 565 | 563 | 622  | 671  | 730  |
|            | 65-74       | 136 | 133 | 156 | 223 | 172 | 231 | 230  | 209  | 218  |
|            | 75 or older | 24  | 32  | 32  | 38  | 42  | 32  | 57   | 51   | 54   |
| 6 (22.09)  | Under 15    | 12  | 6   | 7   | 10  | 4   | 10  | 13   | 10   | 4    |
|            | 15-24       | 24  | 23  | 29  | 31  | 28  | 25  | 31   | 28   | 31   |
|            | 25-34       | 83  | 84  | 86  | 83  | 81  | 73  | 103  | 92   | 78   |
|            | 35-44       | 444 | 486 | 525 | 510 | 506 | 484 | 538  | 532  | 535  |
|            | 45-54       | 725 | 831 | 890 | 862 | 978 | 991 | 1088 | 1068 | 1122 |
|            | 55-64       | 334 | 399 | 433 | 486 | 578 | 532 | 619  | 716  | 755  |
|            | 65-74       | 138 | 132 | 142 | 181 | 169 | 188 | 210  | 213  | 219  |
|            | 75 or older | 15  | 34  | 32  | 29  | 46  | 46  | 54   | 54   | 52   |
| 7 (25.6)   | Under 15    | 6   | 3   | 5   | 5   | 6   | 6   | 6    | 5    | 2    |
|            | 15-24       | 24  | 24  | 20  | 26  | 26  | 33  | 26   | 28   | 17   |
|            | 25-34       | 84  | 58  | 76  | 83  | 83  | 68  | 95   | 85   | 89   |
|            | 35-44       | 407 | 419 | 458 | 469 | 483 | 441 | 475  | 474  | 437  |
|            | 45-54       | 704 | 746 | 776 | 925 | 918 | 951 | 936  | 993  | 1045 |
|            | 55-64       | 324 | 349 | 414 | 456 | 482 | 530 | 595  | 666  | 636  |
|            | 65-74       | 121 | 121 | 143 | 171 | 162 | 193 | 187  | 204  | 217  |
|            | 75 or older | 28  | 21  | 28  | 32  | 35  | 42  | 39   | 46   | 46   |
| 8 (26.02)  | Under 15    | 5   | 6   | 6   | 8   | 6   | 9   | 2    | 5    | 6    |
|            | 15-24       | 24  | 22  | 25  | 21  | 29  | 26  | 23   | 36   | 30   |
|            | 25-34       | 72  | 110 | 113 | 89  | 86  | 108 | 105  | 84   | 85   |
|            | 35-44       | 441 | 476 | 504 | 546 | 476 | 498 | 491  | 525  | 473  |
|            | 45-54       | 767 | 866 | 923 | 988 | 953 | 939 | 1021 | 1103 | 1039 |
|            | 55-64       | 323 | 383 | 466 | 506 | 494 | 544 | 633  | 644  | 691  |
|            | 65-74       | 144 | 144 | 151 | 197 | 183 | 173 | 188  | 223  | 182  |
|            | 75 or older | 22  | 24  | 37  | 31  | 40  | 35  | 36   | 41   | 60   |
| 9 (20.92)  | Under 15    | 7   | 4   | 12  | 9   | 8   | 9   | 8    | 9    | 6    |
|            | 15-24       | 19  | 14  | 24  | 27  | 30  | 22  | 36   | 26   | 26   |
|            | 25-34       | 67  | 76  | 72  | 73  | 91  | 86  | 95   | 100  | 85   |
|            | 35-44       | 410 | 459 | 458 | 434 | 487 | 526 | 474  | 482  | 494  |
|            | 45-54       | 643 | 759 | 776 | 758 | 916 | 981 | 997  | 1030 | 1020 |
|            | 55-64       | 303 | 318 | 359 | 388 | 518 | 492 | 576  | 663  | 622  |
|            | 65-74       | 105 | 133 | 139 | 141 | 170 | 155 | 180  | 217  | 191  |
|            | 75 or older | 17  | 21  | 29  | 24  | 32  | 42  | 38   | 44   | 62   |
| 10 (14.66) | Under 15    | 12  | 2   | 9   | 7   | 10  | 9   | 8    | 1    | 4    |
|            | 15-24       | 16  | 16  | 24  | 27  | 22  | 27  | 37   | 24   | 31   |
|            | 25-34       | 83  | 70  | 97  | 88  | 82  | 85  | 65   | 71   | 70   |
|            | 35-44       | 343 | 430 | 430 | 456 | 458 | 451 | 420  | 431  | 472  |
|            | 45-54       | 600 | 702 | 791 | 835 | 792 | 846 | 813  | 879  | 955  |

|           |             |      |      |      |      |      |      |      |      |      |
|-----------|-------------|------|------|------|------|------|------|------|------|------|
|           | 55-64       | 258  | 325  | 369  | 452  | 430  | 469  | 492  | 541  | 605  |
|           | 65-74       | 112  | 101  | 139  | 122  | 129  | 186  | 176  | 169  | 207  |
|           | 75 or older | 17   | 26   | 29   | 28   | 30   | 49   | 45   | 32   | 47   |
| 11 (8.16) | Under 15    | 8    | 6    | 11   | 6    | 5    | 5    | 3    | 2    | 7    |
|           | 15-24       | 20   | 28   | 23   | 21   | 36   | 24   | 29   | 34   | 30   |
|           | 25-34       | 77   | 90   | 96   | 83   | 97   | 118  | 99   | 95   | 75   |
|           | 35-44       | 467  | 518  | 497  | 528  | 492  | 496  | 535  | 516  | 502  |
|           | 45-54       | 823  | 931  | 901  | 952  | 878  | 947  | 1046 | 1091 | 1061 |
|           | 55-64       | 344  | 404  | 417  | 505  | 474  | 567  | 612  | 664  | 719  |
|           | 65-74       | 160  | 144  | 173  | 172  | 166  | 199  | 218  | 207  | 216  |
|           | 75 or older | 23   | 24   | 46   | 28   | 41   | 33   | 46   | 51   | 58   |
| 12 (0.94) | Under 15    | 9    | 7    | 13   | 6    | 3    | 8    | 3    | 5    | 7    |
|           | 15-24       | 23   | 24   | 17   | 22   | 32   | 36   | 37   | 33   | 27   |
|           | 25-34       | 100  | 122  | 95   | 119  | 105  | 121  | 136  | 107  | 118  |
|           | 35-44       | 526  | 632  | 648  | 676  | 682  | 692  | 718  | 698  | 659  |
|           | 45-54       | 1039 | 1131 | 1118 | 1230 | 1237 | 1264 | 1296 | 1390 | 1312 |
|           | 55-64       | 431  | 490  | 521  | 653  | 677  | 787  | 869  | 895  | 899  |
|           | 65-74       | 187  | 190  | 190  | 223  | 228  | 264  | 270  | 262  | 272  |
|           | 75 or older | 35   | 35   | 33   | 50   | 50   | 63   | 55   | 48   | 58   |

\* 9-year average monthly temperature(°C) in parentheses. Monthly average temperature data is available on the following site: Korea Meteorological Administration Weather Data Service (<https://data.kma.go.kr/>)

**Table S4.** Within-hospital prescriptions.

| <b>Categories</b>         | <b>No. of Claims</b> | <b>Average expenditure per claim</b> | <b>Average expenditure per patient</b> |
|---------------------------|----------------------|--------------------------------------|----------------------------------------|
| Anti-inflammatory enzymes | 159,970              | 0.88                                 | 2                                      |
| NSAIDs                    | 306,352              | 2.51                                 | 6.42                                   |
| Acetaminophen(AAP)        | 108,777              | 1.81                                 | 4.3                                    |
| Antispasmodic             | 10,871               | 1.52                                 | 3.21                                   |
| Propulsives               | 167,923              | 2.38                                 | 5.61                                   |
| Other propulsives         | 104,893              | 1.21                                 | 2.77                                   |
| Antacids                  | 29,015               | 0.45                                 | 0.97                                   |
| Psychiatric agents        | 10,625               | 0.73                                 | 1.6                                    |
| Muscle relaxants          | 99,737               | 1.4                                  | 2.96                                   |
| Hormones                  | 19,724               | 0.36                                 | 0.73                                   |
| Antibiotics               | 1,541                | 3.96                                 | 5.83                                   |
| Blood circulation agents  | 8,071                | 4.98                                 | 10.59                                  |

All expenditures were converted with annual average exchange rate (KRW/USD) (See Supplementary Table 1)
